# Supplementary material for: Association of electronic cigarette use with self-reported difficulty concentrating, remembering, or making decisions in US youth
Source: PubMed Central journal article supplement (PMC7759092; doi:10.18332/tid/130925), 2020-12-22
Supplement: TID-18-106-s1.pdf [file TID-18-106-s1.pdf]

**Supplemental Table S1: Adjusted odds ratios of self-reported difficulty concentrating, remembering, or making decisions because of a physical, mental, or emotional condition in youth.**

| Variables                                                                                                                   | Adjusted Odds Ratio (95% CI) |
|-----------------------------------------------------------------------------------------------------------------------------|------------------------------|
| Smoking and Vaping Status                                                                                                   |                              |
| Ever dual users                                                                                                             | 4.19(2.97,5.92)              |
| Exclusive ever cigarette smokers                                                                                            | 1.50(1.18,1.91)              |
| Exclusive ever e-cigarette users                                                                                            | 3.13(2.25,4.34)              |
| Never users                                                                                                                 | Reference                    |
| Age of participant                                                                                                          | 0.98(0.95,1.01)              |
| Sex                                                                                                                         |                              |
| Male                                                                                                                        | 1.40(1.27,1.54)              |
| Female                                                                                                                      | Reference                    |
| Race/Ethnicity                                                                                                              |                              |
| Non-Hispanic Black                                                                                                          | 1.19(1.00,1.42)              |
| Hispanic                                                                                                                    | 1.29(1.12,1.48)              |
| Non-Hispanic Asian                                                                                                          | 0.70(0.50,0.98)              |
| Non-Hispanic AI/AN                                                                                                          | 1.93(1.36,2.73)              |
| Non-Hispanic NHOPI                                                                                                          | 1.44(0.79,2.62)              |
| Multiple races                                                                                                              | 1.26(0.99,1.61)              |
| Non-Hispanic White                                                                                                          | Reference                    |
| Other tobacco use                                                                                                           |                              |
| Yes                                                                                                                         | 1.07(0.91,1.27)              |
| No                                                                                                                          | Reference                    |
| During the past 30 days, have you had a strong craving or felt like you really needed to use a tobacco product of any kind? |                              |
| Yes                                                                                                                         | 2.64(2.14,3.24)              |
| No                                                                                                                          | Reference                    |
| During the past 30 days, on how many days did you use any tobacco product(s)?                                               |                              |
| 1 or 2 days                                                                                                                 | 1.01(0.75,1.37)              |
| 3 to 5 days                                                                                                                 | 1.07(0.74,1.55)              |
| 6 to 9 days                                                                                                                 | 0.50(0.34,0.74)              |
| 10 to 19 days                                                                                                               | 1.13(0.74,1.73)              |
| 20 to 29 days                                                                                                               | 0.45(0.26,0.79)              |
| All 30 days                                                                                                                 | 0.64(0.44,0.93)              |
| 0 days                                                                                                                      | Reference                    |
| Reported you smoked cigarettes on $\geq$ 1 of the past 30 days                                                              |                              |
| Yes                                                                                                                         | 1.52(1.17,1.98)              |
| No                                                                                                                          | Reference                    |
| How old were you when you first tried using an e-cigarette, even once or twice?                                             | 0.89(0.85,0.93)              |
